# Supplementary material for: Human Papillary and Reticular Fibroblasts Show Distinct Functions on Tumor Behavior in 3D-Organotypic Cultures Mimicking Melanoma and HNSCC
Source: MDPI journal article supplement (doi:10.3390/ijms231911651), 2022-10-01
Supplement: s1 [file s1]

Table S1: Primary antibody specifications

| Antibody         | Cat.#      | Host   | Dilution | Source                                |
|------------------|------------|--------|----------|---------------------------------------|
| Collagen type IV | PHM12      | Mouse  | 1:150    | Chemicon, Temecula, USA               |
| Ki67             | MIB1       | Mouse  | 1:75     | Dako, Glostrup, Germany               |
| Keratin 17       | CK-E3      | Mouse  | 1:25     | Novus Biologicals, Colorado, USA      |
| Keratin 10       | DE-K10     | Mouse  | 1:100    | Labvision/neomarkers, California, USA |
| Vimentin         | EPR3776    | Rabbit | 1:1000   | Abcam                                 |
| $\alpha$ -SMA    | 1A4        | Mouse  | 1:400    | Abcam                                 |
| ZEB2             | HPA003456  | Rabbit | 1:250    | Atlas antibodies                      |
| ZEB1             | HPA027524  | Rabbit | 1:666    | Atlas antibodies                      |
| $\beta$ -catenin | 610154     | Mouse  | 1:250    | BD Bioscience                         |
| SPARC            | 15274-1-AP | Rabbit | 1:400    | Proteintech                           |
| NKI/beteb        | ab34165    | Mouse  | 1:100    | Abcam                                 |
| Pro-COL11A1      | CI0011     | Mouse  | 1:125    | Oncomatrix                            |

Table S2: qPCR primer specifications

| Gene                     | Forward primer 5'> 3'  | Reverse primer 5'> 3'     |
|--------------------------|------------------------|---------------------------|
| <b>Genes of interest</b> |                        |                           |
| SERPINB4                 | CAAAGGGCAGTGGGAGAATA   | CCTCCAGCAAGGCAAAATTA      |
| MMP9                     | CCTGGAGACCTGAGAACCAA   | ATTTCGACTCTCCACGCATC      |
| SNAI2                    | ACAAGCAGCTGCACTGTGAT   | ACACAAGGCAATGTGTGGGT      |
| N-cadherin               | TCATTGCCATCCTGCTCTGCAT | AGTTGTTTGGCCTGGCGTTCTT    |
| CLEC3B                   | CTCAAGAGCCGCTCTGGACACC | AAGCATTTTCATGTGCACCTTGG   |
| COL7A1                   | GTACCAGGACCCTGAAGCTC   | GTACCAGCGCAGGGTGTAG       |
| MMP12                    | ATGCAGCTGTTTTTAACCCACG | TGGGATAACCAGGGTCCATCA     |
| MMP3                     | AGGCTTTCCCAAGCAAATAGC  | GGGTCAAACCTCAAAGTGTGA     |
| COL11A1                  | AAAGCACTTCGCTTCCTGGG   | GACAGTCTTTTCATAGCCTTTTCTG |
| HAS1                     | TACTTTTGGGGATGACCGGC   | GACGAGGGCGTCTCTGAGTA      |
| ITG $\beta$ 2            | GGGATGGACCGCTACCTCAT   | GAATGCCGATCAGCACGATG      |
| MCAM                     | TCATTGATGGAGTGCCTGTG   | CTGTTTCTCCACCTCCAGTAGA    |
| POSTN                    | TCATTGATGGAGTGCCTGTG   | CTGTTTCTCCACCTCCAGTAGA    |
| SPP1                     | AGAAGTTTCGCAGACCTGACA  | GGGATGGCCTTGTATGCACC      |
| VCAM                     | CAGGCTGGAAGAAGCAGAAAG  | TGTCTCCTTCTTTGACACTCTCAG  |
| SOX10                    | TGAAGGCAGGAAGGAGTTGGC  | TGGAGGTTGTAGTGGAGGAGGAC   |
| MMP9                     | CGACGTCTTCCAGTACCGAG   | CTGGTTCAAACCTACTCCGGG     |
| SPARC                    | CTGGACCAGCACCCATTGA    | AGGTCTCGAAAAAGCGGGTG      |
| TGF $\beta$ 3            | CGGGCTTTGGACACCAATTAC  | CCCAGATCCTGTCTGGAAGTC     |
| ITG $\alpha$ 5           | CCTGCTCATCCAGAATGGGG   | CGATGTGAATCGGCGAGAGT      |
| TMEM132A                 | AAATCCTGGTGTCTGAGCGG   | CTCCAGTCAGTGGTGCTGTA      |
| TMEFF1                   | TGCCCTGAAAACCTCAATGGT  | TTTCACAGTGCTGTCCAGTGT     |
| ZEB2                     | AAGTACCAGCGGAAACAAGGA  | ACAGACAGGAGTCGGAGTCT      |
| SERPINE1                 | TCCACAAATCAGACGGCAGC   | TCGTAGTAATGGCCATCGGG      |

|                        |                          |                        |
|------------------------|--------------------------|------------------------|
| FZD7                   | GCTCATGAACAAGTTCGGCTT    | GAGCCGTCCGACGTGTTCT    |
| $\alpha$ -SMA          | CTCGGGCTGAAGAAGGAACCCAA  | ATTGGCACACGGCAGGTGGT   |
| CCRL1                  | TGAGGGTCCTACAGAGCCAACCA  | CTCCCCCTTCCCCCAACCCA   |
| TGM2                   | GGTGTCCCTGCAGAACCCGC     | CGGGGTCTGGGATCTCCACCG  |
| MGP                    | GCCATCCTGGCCGCCTTAGC     | TTGGTCCCTCGGCGCTTCCT   |
| <b>Reference genes</b> |                          |                        |
| RPS29                  | TATGTGCCGCCAGTGTTTCC     | TGCCCCGGATAATCCTCTGA   |
| ZNF410                 | GCTGTGGTAAGCAGTTTACTACAG | CTTGGGCTTCACAAAGGAAAGG |

Figure S1: The mRNA expression of SOX10 in melanoma FTMs

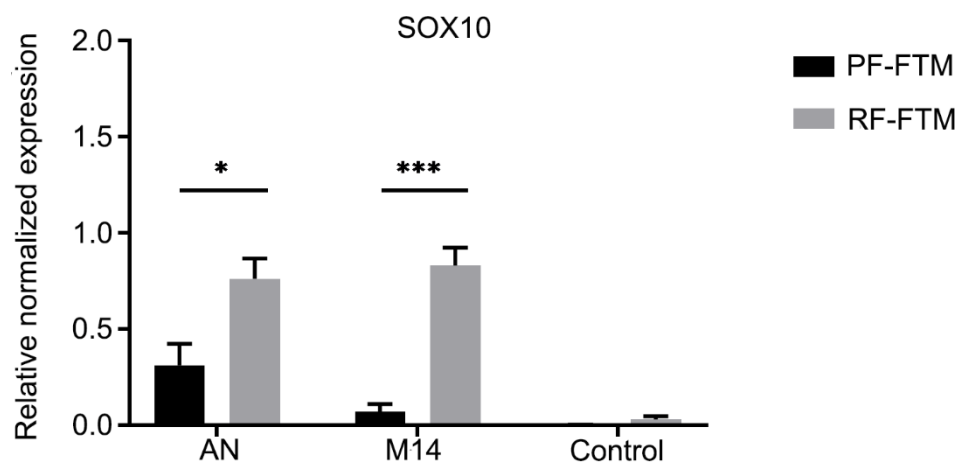

Data was collected from three independent experiments and presented as mean  $\pm$  standard deviation (SD); \*  $p < 0.05$ , \*\*\*  $p < 0.001$ .

Figure S2: The quantification of NKI-Beteb, K17 and K10 in melanoma and HNSCC FTMs

a

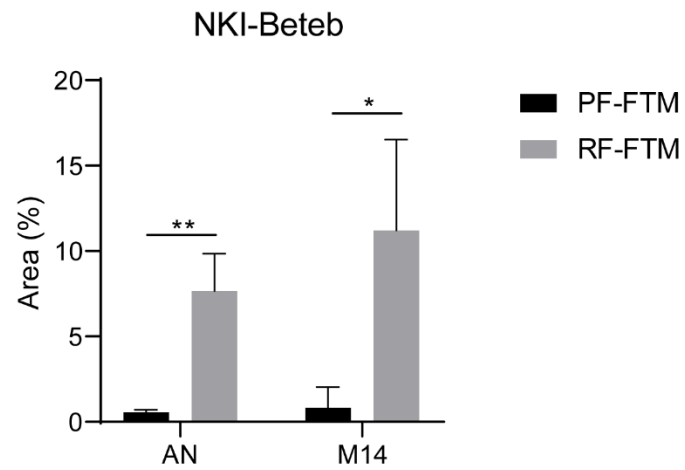

b

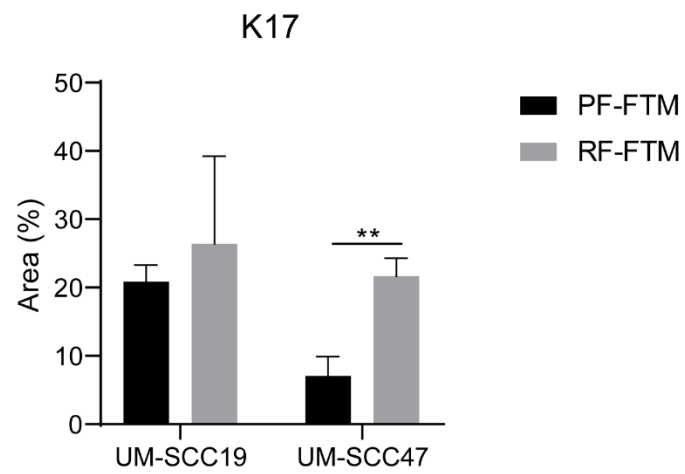

c

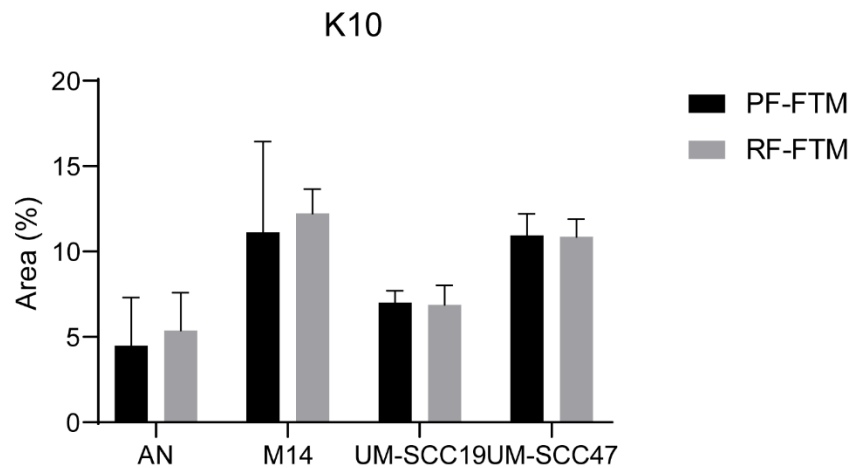

The percentage of positive staining area of (a) NKI-Beteb, (b) K17 and (c) K10 in each FTM was calculated. Data was obtained from three independent experiments and presented as mean  $\pm$  standard deviation (SD); \*  $p < 0.05$ ; \*\*  $p < 0.01$ .
